# Supplementary material for: Putative WRKYs associated with regulation of fruit ripening revealed by detailed expression analysis of the WRKY gene family in pepper
Source: PubMed Central journal article supplement (PMC5171846; doi:10.1038/srep39000), 2016-12-19
Supplement: srep39000-s1.pdf [file srep39000-s1.pdf]

**Putative WRKYs associated with regulation of fruit ripening revealed by detailed expression analysis  
of the WRKY gene family in pepper**

Yuan Cheng<sup>1</sup>, Golam Jalal Ahammed<sup>2</sup>, Jiahong Yu<sup>1</sup>, Zhuping Yao<sup>1</sup>, Meiyong Ruan<sup>1</sup>, Qingjing Ye<sup>1</sup>, Zhimiao Li<sup>1</sup>, Rongqing Wang<sup>1</sup>, Kun Feng<sup>1</sup>,  
Guozhi Zhou<sup>1</sup>, Yuejian Yang<sup>1</sup>, Weiping Diao<sup>3</sup>, Hongjian Wan<sup>1\*</sup>

<sup>1</sup>State key Laboratory Breeding Base for Zhejiang Sustainable Pest and Disease Control, Institute of Vegetables, Zhejiang Academy of Agricultural Sciences, Hangzhou, China

<sup>2</sup>Department of Horticulture, Zhejiang University, Hangzhou, China

<sup>3</sup>Institute of Vegetables, Jiangsu Academy of Agricultural Sciences, Nanjing, China

Tel: +86-571-86404352 Fax: +86-571-86400997

\*Corresponding to Dr. Hongjian Wan, E-mail: [hjwan@mail.zaas.ac.cn](mailto:hjwan@mail.zaas.ac.cn)

Supplemental Table S1 The WRKY gene family in pepper

| Name     | Locus           |        | Chromosome                      |
|----------|-----------------|--------|---------------------------------|
| CaWRKY01 | Capana01g000165 | [mRNA] | locus=Chr01:2380410:2384292     |
| CaWRKY02 | Capana01g000167 | [mRNA] | locus=Chr01:2417686:2419547     |
| CaWRKY03 | Capana01g002803 | [mRNA] | locus=Chr01:178651461:178653597 |
| CaWRKY04 | Capana01g003441 | [mRNA] | locus=Chr01:226400966:226405165 |
| CaWRKY05 | Capana01g004471 | [mRNA] | locus=Chr01:300738347:300739954 |
| CaWRKY06 | Capana01g004472 | [mRNA] | locus=Chr01:300742280:300745209 |
| CaWRKY07 | Capana02g000212 | [mRNA] | locus=Chr02:26415840:26420359   |
| CaWRKY08 | Capana02g000680 | [mRNA] | locus=Chr02:83748217:83749821   |
| CaWRKY09 | Capana02g000918 | [mRNA] | locus=Chr02:102411100:102416945 |
| CaWRKY10 | Capana02g001642 | [mRNA] | locus=Chr02:129707611:129709054 |
| CaWRKY11 | Capana02g002230 | [mRNA] | locus=Chr02:142213621:142216150 |
| CaWRKY12 | Capana02g003053 | [mRNA] | locus=Chr02:154730960:154732560 |
| CaWRKY13 | Capana02g003339 | [mRNA] | locus=Chr02:159222405:159225272 |
| CaWRKY14 | Capana02g003661 | [mRNA] | locus=Chr02:163357641:163359108 |
| CaWRKY15 | Capana03g000473 | [mRNA] | locus=Chr03:6501568:6503375     |
| CaWRKY16 | Capana03g001099 | [mRNA] | locus=Chr03:18684171:18687268   |
| CaWRKY17 | Capana03g001962 | [mRNA] | locus=Chr03:39904102:39904887   |
| CaWRKY18 | Capana03g002072 | [mRNA] | locus=Chr03:44184049:44185319   |
| CaWRKY19 | Capana03g002134 | [mRNA] | locus=Chr03:48509522:48510754   |
| CaWRKY20 | Capana03g002635 | [mRNA] | locus=Chr03:93204626:93207341   |
| CaWRKY21 | Capana03g003085 | [mRNA] | locus=Chr03:167540037:167548534 |
| CaWRKY22 | Capana03g003279 | [mRNA] | locus=Chr03:203453030:203454904 |
| CaWRKY23 | Capana04g000568 | [mRNA] | locus=Chr04:9062869:9064395     |
| CaWRKY24 | Capana04g001820 | [mRNA] | locus=Chr04:115696954:115705628 |

---

|          |                 |        |                                 |
|----------|-----------------|--------|---------------------------------|
| CaWRKY25 | Capana05g002502 | [mRNA] | locus=Chr05:216311579:216315172 |
| CaWRKY26 | Capana06g001008 | [mRNA] | locus=Chr06:17571223:17578663   |
| CaWRKY27 | Capana06g001110 | [mRNA] | locus=Chr06:20042156:20043655   |
| CaWRKY28 | Capana06g001506 | [mRNA] | locus=Chr06:35621649:35624167   |
| CaWRKY29 | Capana06g002128 | [mRNA] | locus=Chr06:92548747:92550798   |
| CaWRKY30 | Capana06g003072 | [mRNA] | locus=Chr06:218689176:218691106 |
| CaWRKY31 | Capana07g000181 | [mRNA] | locus=Chr07:9032674:9041137     |
| CaWRKY32 | Capana07g000528 | [mRNA] | locus=Chr07:40750931:40752123   |
| CaWRKY33 | Capana07g001256 | [mRNA] | locus=Chr07:167387734:167411421 |
| CaWRKY34 | Capana07g001387 | [mRNA] | locus=Chr07:177671908:177674692 |
| CaWRKY35 | Capana07g001809 | [mRNA] | locus=Chr07:204092824:204096737 |
| CaWRKY36 | Capana07g001968 | [mRNA] | locus=Chr07:210180549:210184089 |
| CaWRKY37 | Capana07g002350 | [mRNA] | locus=Chr07:219055519:219061043 |
| CaWRKY38 | Capana07g002454 | [mRNA] | locus=Chr07:220545442:220548961 |
| CaWRKY39 | Capana08g000429 | [mRNA] | locus=Chr08:60198759:60200111   |
| CaWRKY40 | Capana08g000683 | [mRNA] | locus=Chr08:101219429:101222082 |
| CaWRKY41 | Capana08g001012 | [mRNA] | locus=Chr08:123573760:123575138 |
| CaWRKY42 | Capana08g001044 | [mRNA] | locus=Chr08:124129873:124131797 |
| CaWRKY43 | Capana08g001961 | [mRNA] | locus=Chr08:139093292:139095397 |
| CaWRKY44 | Capana09g000676 | [mRNA] | locus=Chr09:32179774:32181439   |
| CaWRKY45 | Capana09g001251 | [mRNA] | locus=Chr09:129708552:129712643 |
| CaWRKY46 | Capana09g001790 | [mRNA] | locus=Chr09:205298779:205300747 |
| CaWRKY47 | Capana10g000205 | [mRNA] | locus=Chr10:3656310:3659300     |
| CaWRKY48 | Capana10g000754 | [mRNA] | locus=Chr10:46615318:46617494   |
| CaWRKY49 | Capana10g001220 | [mRNA] | locus=Chr10:128628965:128629689 |
| CaWRKY50 | Capana10g001548 | [mRNA] | locus=Chr10:164830295:164833345 |

---

---

|          |                 |        |                                 |
|----------|-----------------|--------|---------------------------------|
| CaWRKY51 | Capana10g001791 | [mRNA] | locus=Chr10:183798726:183801612 |
| CaWRKY52 | Capana10g001805 | [mRNA] | locus=Chr10:185896489:185897886 |
| CaWRKY53 | Capana11g001882 | [mRNA] | locus=Chr11:200570029:200575124 |
| CaWRKY54 | Capana11g001905 | [mRNA] | locus=Chr11:201981442:201987021 |
| CaWRKY55 | Capana12g001134 | [mRNA] | locus=Chr12:48289811:48291121   |
| CaWRKY56 | Capana12g001826 | [mRNA] | locus=Chr12:170920299:170933933 |
| CaWRKY57 | Capana12g001851 | [mRNA] | locus=Chr12:173653320:173658337 |
| CaWRKY58 | Capana00g000429 | [mRNA] | locus=Chr00:245677269:245678729 |
| CaWRKY59 | Capana00g001033 | [mRNA] | locus=Chr00:331116291:331117751 |
| CaWRKY60 | Capana00g003083 | [mRNA] | locus=Chr00:523068129:523069793 |
| CaWRKY61 | Capana00g004112 | [mRNA] | locus=Chr00:612680042:612682368 |

---

Supplemental Table S2. Classification of CaWRKY in pepper based on phylogenetic tree (Supplement Figure S1)

| Group I  | Group II a | Group II b | Group II c | Group II d | Group II e | Group III | None group |
|----------|------------|------------|------------|------------|------------|-----------|------------|
| CaWRKY13 | CaWRKY15   | CaWRKY09   | CaWRKY03   | CaWRKY08   | CaWRKY02   | CaWRKY05  | CaWRKY01   |
| CaWRKY21 | CaWRKY27   | CaWRKY11   | CaWRKY04   | CaWRKY22   | CaWRKY07   | CaWRKY06  | CaWRKY12   |
| CaWRKY24 | CaWRKY40   | CaWRKY16   | CaWRKY14   | CaWRKY23   | CaWRKY10   | CaWRKY18  | CaWRKY52   |
| CaWRKY25 | CaWRKY55   | CaWRKY26   | CaWRKY36   | CaWRKY30   | CaWRKY35   | CaWRKY20  | CaWRKY17   |
| CaWRKY28 |            | CaWRKY34   | CaWRKY39   | CaWRKY60   | CaWRKY41   | CaWRKY29  | CaWRKY19   |
| CaWRKY31 |            | CaWRKY43   | CaWRKY44   |            | CaWRKY48   | CaWRKY32  | CaWRKY46   |
| CaWRKY33 |            |            | CaWRKY54   |            |            | CaWRKY42  |            |
| CaWRKY37 |            |            | CaWRKY56   |            |            | CaWRKY49  |            |
| CaWRKY38 |            |            | CaWRKY57   |            |            | CaWRKY50  |            |
| CaWRKY45 |            |            | CaWRKY58   |            |            |           |            |
| CaWRKY47 |            |            | CaWRKY59   |            |            |           |            |
| CaWRKY51 |            |            | CaWRKY61   |            |            |           |            |
| CaWRKY53 |            |            |            |            |            |           |            |

Supplemental Table S3. Amino acid sequences of WRKY domain of WRKY genes in pepper

| Name      | WRKY domain                                                      |
|-----------|------------------------------------------------------------------|
| CaWRKY01  | LDDGFKWRKYGQKAVKNSTHPRD (Incomplete)                             |
| CaWRKY02  | SDKWAWRKYGQKPIKGSPPYPRSYRCSSSkGCLARKQVEQSCTEHGIFIVTYTAEHNHS      |
| CaWRKY03  | EDGYRWRKYGQKAVKNSPFPRNYRCTSATCNVKKRVERCFSDPSIVVTTYEGK            |
| CaWRKY04  | LDDGYKWRKYGQKVVKNSLHPRSYYRCTHSNCRVKKRVERLSEDCRMVITTYEGRHNHS      |
| CaWRKY05  | DDGYSWRKYGQKHILGAKYPRSYRCTYRhmqNCWATKQVQRSDDDATVYEITYRGSNCR      |
| CaWRKY06  | DDGYSWRKYGQKDILGAKYPRSYRCTYRhmqNCWATKQVQRSDDDPVFDVITYRGSNSCH     |
| CaWRKY07  | SDLWAWRKYGQKPIKGSPPYPRGYRCSSSkGCSARKQVERSRDPNMLVITYTSEHNHP       |
| CaWRKY08  | DDYSWRKYGQKPIKGSPPRAYYKCSSVrGCPARKHVERALDEPTMLVVITYESEHNHS       |
| CaWRKY09  | NDGCQWRKYGQKISRGNPCPRAYYRCSVApLCPVRKQVQRLEDMSILITTYEGTHNHS       |
| CaWRKY10  | SDSWAWRKYGQKPIKGSPPYPRGYRCSSSkGCPARKQVERSRADPNMLIVTYSCEHNHP      |
| CaWRKY11  | SDGCQWRKYGQKMAKGNPCPRAYYRCTMAvGCPVRKQVQRCAEDRTILITTYEGTHNHP      |
| CaWRKY12  | DDYSWRKYGQKPIKGSPPH (Incomplete)                                 |
| CaWRKY13N | DGYNWRKYGQKKVKATECPRSYYKCTHLKCPAKKKVEKSV-DGHITEITYNGRHNHA        |
| CaWRKY13C | LDDGYRWRKYGQKAVKGTQHPRSYYRCTYAGCNVRKQVERASTDPKAVITTYEGKHNHD      |
| CaWRKY14  | LDDGYRWRKYGQKAVKNNNYPRSYYRCTHEGCNVKKQVQRLSKDEGVVVTTYEGMHTHP      |
| CaWRKY15  | VKDGYPWRKYGQKVTRDNPSPRAYFKCSFApTCPVKKKQVRSLEDQSILVATYEGEHNHNSK   |
| CaWRKY16  | MNDGCQWRKYGQKIAKGNPCPRAYYRCTVApSCPVRKQVQRCIQDMSILIITYEGTHNHP     |
| CaWRKY17  | ADQWRWRKYGMKRTGGSPFLKSYRRCNQGedCPARRHVQQSSTDSNKVIVTYRGQHSHP      |
| CaWRKY18  | LDDGFSWRKYGQKDILGAKHPRGYRCTLRhvqGCLATKQVQRSDEDPDPTIFEVITYRGRHTCS |
| CaWRKY19  | DDIWSWRKYGQKFIKSSFPNRYFKCNTSeLCQARKQIEKSSKNDCFFLVAYS GMHNHD      |
| CaWRKY20  | MNDGCAWRKYGQKSILNSKYPRCYRCTHkydqDCRATKQVHIMQENPKIMYHTTYFGNHTCN   |

---

CaWRKY21N EDGYNWRKYGQKLVKGSEFPRSYYKCTYPNCEVKKIFERPP-DGQITEIVYKGSHDHPK  
CaWRKY21C LDDGYRWRKYGQKVVRGNPNPRSYYKCTNARCPVRKHVERASHDPKAVITTYEGKHNHD  
CaWRKY22 DEYSWRKYGQKPIKGSHPRGYYKCSSMrGCPARKHVERCLEEPSMLIVTYEGEHNHS  
CaWRKY23 DDYSWRKYGQKPIKGSHPRGYYKCSSVrGCPARKHVERALDDPAMLIVTYEGEHNHS  
CaWRKY24N SDGYNWRKYGQKMKVKASECPRSYYKCTHVKCPVRKKVERSV-DGHVTEITYKGHHNHE  
CaWRKY24C LDDGFKWRKYGQKVVKGNHHPRSYYRCTYPGCNVRKHVERASTDPKAVITTYEGKHNHE  
CaWRKY25N DDGYTWRKYGQKHVKGSNFPRSYYKCTQQTCPVRKKVECAP-NGQVIEIVYNGPHNHPK  
CaWRKY25C EDGYRWRKYGQKVVKGNPNPRSYYKCTSAGCLVRKHVERASDDLKSVITTYEGKHNHE  
CaWRKY26 MNDGCQWRKYGQKIAKGNPCPRAYYRCTVApNCPVRKQVQRCAEDMSILITTYEGTHNHT  
CaWRKY27 VKDGYQWRKYGQKVTRDNPCPRAYFRCSFApTCPVKKKQVQRSIEDQSIVVATYEGEHNHP  
CaWRKY28N DDGYNWRKYGQKQVKGSENPRSYYKCTYPNCPTKKKVERSL-DGQITEIVYKGNHNHPK  
CaWRKY28C LDDGYRWRKYGQKVVKGNPNPRSYYKCTSPGCPVRKHVERASQDIKSVITTYEGKHNHD  
CaWRKY29 EDGYTWRKYGQKEILGSRFPRAYYRCTHQklyHCPAKKQVQRDLNDPYYVFEVTYRSQHIC  
CaWRKY30 SDEYSWRKYGQKPIKGSHPRGYYKCSSMrGCPARKHVERCLEDPMSMLIVTYEGEHNHP  
CaWRKY31N RDGYNWRKYGQKQVKSPQGTRSYYRCTHFECACK-IECSGHTNRVMEIIRSEHNHD  
CaWRKY31C SDGYRWRKYGQKMKVKGPNPHPRNYRCSAGCPVRKHIERAVDSTIALTITYKGVHDHD  
CaWRKY32 EDGYSWRKYGQKLIVGAKYPREHYRCDCrIsYREATKMVQRSEAEPVSFEVTYGGNS  
CaWRKY33N EDGYNWRKYGQKLVVRGNMFTRSYYKCTHSNCLAKKQVERSH-DGHITNIQYITNHEHPK  
CaWRKY33C LNDGYRWRKYGQKFVKGNPNPRSYYRCSAGCPAKKHVERASHDPKL VITTYEGQHEHD  
CaWRKY34 TDGCQWRKYGQKMAKGNPCPRAYYRCTMAaGCPVRKQVQRCAEDRTILITTYEGTHNHP  
CaWRKY35 DSWSWRKYGQKPIKGSYPYRGYYRCSskGCPARKQVERSCLDPTMLLITYCSDHNHQ  
CaWRKY36 EDGYRWRKYGQKAVKNSPFPRSYYRCTSQKCSVKKRVERSYQDPSIVITTYEGQHNNH  
CaWRKY37N DDGYNWRKYGQKLVKGSEFPRSYYKCTYPNCEVKKIFERSP-EGQITEIVYKGSHDHPK  
CaWRKY37C LDDGYKWRKYGQKVVRGNPNPRSYYKCTNAGCPVRKHVERASHDPKAVITTYEGKHNHD

---

---

CaWRKY38N EDGYNWRKYGQKQVKGSEYPRSYYKCTHPNCPVKKKVERSQ-EGHITEIYKGAHNHPK  
CaWRKY38C LDDGYRWRKYGQKVVKGNPNPRSYYKCTSAGCNVRKHVERASHDLKSVITTYEGKHNHD  
CaWRKY39 LDDGYKWRKYGKKMVKNSPNPRNYYRCSVEGCPVKKRVERDKEDSRVITTYEGVHNHQ  
CaWRKY40 VKDGYNWRKYGQKVTRDNPYPRAYYKCSFApTCPVKKKVQRSIEDPSILVAVYEGEHNHP  
CaWRKY41 SDMWSWRKYGQKPIKGSPPYRGYYRCSTSkGCLARKQVERNRSDPNMFIVTYTAEHNHP  
CaWRKY42 EDGFSWRKYGQKDILGANHPRAYRCTHRhtqGCLATKQVQRS DGNSTIFEV TYKGRH SCK  
CaWRKY43 MNDGCQWRKYGQKIAKGSPhCPRAYRCTVApGCPVRKQVQR CLEDMSILITTYEGTHNHP  
CaWRKY44 EDGYRWRKYGQKAVKNSPFPRNYYRCTTQKCSVKKRVERSYEDASIVITTYEGQHNNH  
CaWRKY45N EDGYNWRKYGQKQVKGSENPRSYYKCTFPNCPTKKKVERNLDGHVTEIVYKGSHNHPK  
CaWRKY45C LDDGYRWRKYGQKVVKGNPNPRSYYKCTFIGCPVRKHVERASHDLRAVITTYEGKHNHD  
CaWRKY46 DDGYKWRKYGQKSIKNSPYPRSYYKCTNPRCGAKKQVERSSNEPDTFIITYEGLHLH  
CaWRKY47N EDGYNWRKYGQNQANGRTYPRSYYKCAYPKCPVKKRVGGYH-DCQVMEIYKGIHNHPK  
CaWRKY47C KRRSYKCTSSGCNVRKHIQRSPYDQKSVITTYDGKHYHE  
CaWRKY48 SDMWSWRKYGQKPIKGSPPYRGYYKCSSTSkACLARKQVERNRSDPNMFIVTYTAEHNHP  
CaWRKY49 VDDGHVWRKYGQKEILNFPHPRNYYRCTHKfdrGCEATKQVQRIQENPPKFRTTYQGHHSCT  
CaWRKY50 VDDGHGWRKYGQKQILNAKFPRNYFRCTHKfdqGCQASKQVQRIQENPPLFRITYYGHHTCK  
CaWRKY51N DGYNWRKYGQKKVKGSEYPRSYYKCTHLKCPVKKKVERSY-DGQITEIVYRGDHNHPK  
CaWRKY51C EDGFRWRKYGHKVVKGSSYPRSYYRCTSPKCSVRKFVERTTDDPRAFITTYEGKHNH  
CaWRKY52 DGYNWRKYGQKQVKGSEYPRSYYKCTHLKCLVKKKVERSY-DGQITEIVYRGEHNHPK  
CaWRKY53N DDGYNWRKYGQKQVKGSEYPRSYYKCTQPNCVKKKVERS L-DGQVTEIYKGGQHNNHQ  
CaWRKY53C LDDGYRWRKYGQKVVKGNPNYPRSYYKCTSQGCNVRKHVERAASDPKAVITTYEGKHNHD  
CaWRKY54 EDGYRWRKYGQKAVKNSPFPRNYYRCTNTKCTVKKRVERSSSEDSSIVITTYEGQHCHH  
CaWRKY55 VKDGYNWRKYGQKVTRDNPSPRAYYKCSFApTCPVKKKVQRSVKDPSVLVATYEGEHNHP  
CaWRKY56 LDDGYKWRKYGKKMVKNSPNPRNYYKCSNGGCNVKKRVERDNEDSSYVITTYEGIHNHE

---



---

|          |                                                            |
|----------|------------------------------------------------------------|
| CaWRKY57 | LDDGYKWRKYGQKVVKNTQHPRSYRCTQDNCRVKKRVERLAEDPRMVITTYEGRHVHS |
| CaWRKY58 | KKKGEKKIKKPRSYRCTHQGCNVKKQVQRLSKDEGVVVTTYEGMHSHP           |
| CaWRKY59 | LDDGYRWRKYGQKAVKNNKFPRSYRCTHQGCNVKKQVQRLSKDEGVVVTTYEGMHSHP |
| CaWRKY60 | ADEFTWRKYGQKPIKGSYPRGYRCSLkGCPARKHVERATDDPRMLIVTYENDHEHH   |
| CaWRKY61 | LDDGYKWRKYGKKKVKSNLNRNYYKCSSGDCKVKKRVERDGNSSYLITTYEGRHNHE  |

---

Supplemental Table S4. Fragments per kilobase of exon model per million mapped (FPKM) values of all the CaWRKYs in different pepper (Zunla-1)tissues

| Name     | pepper tissues |           |           |           |           |             |             |             |             |
|----------|----------------|-----------|-----------|-----------|-----------|-------------|-------------|-------------|-------------|
|          | Root           | Stem      | Leaf      | Bud       | Flower    | Fruit-Dev5  | Fruit-Dev6  | Fruit-Dev7  | Fruit-Dev8  |
| CaWRKY01 | 0.4910948      | 0.1239128 | 0.2750121 | 0         | 0         | 0           | 0           | 0.45114178  | 31.41895655 |
| CaWRKY02 | 25.693427      | 3.7984634 | 12.726526 | 0.5705227 | 2.7314436 | 0           | 0           | 0           | 0.542759526 |
| CaWRKY03 | 99.455847      | 56.36566  | 55.867869 | 4.5604284 | 19.407626 | 4.990421537 | 12.70307388 | 36.09233178 | 25.06692022 |
| CaWRKY04 | 1.954148       | 20.70893  | 0.8754553 | 0.3851028 | 1.6496482 | 0           | 0.178784003 | 0           | 0.18318134  |
| CaWRKY05 | 0              | 0.1908657 | 0.6354111 | 0         | 0.0939079 | 0           | 0           | 0.086862984 | 0           |
| CaWRKY06 | 34.251444      | 86.09697  | 334.29294 | 18.648681 | 54.922053 | 0.08959182  | 0.760183949 | 1.441788741 | 5.192541924 |
| CaWRKY07 | 6.0077938      | 1.695182  | 2.0981986 | 0.9548004 | 7.1214759 | 0           | 0           | 0           | 0.12111163  |
| CaWRKY08 | 8.3208882      | 19.595547 | 38.548272 | 0.3726802 | 4.2571566 | 0.73407491  | 1.614823251 | 6.254134843 | 5.790893977 |
| CaWRKY09 | 11.210638      | 0.7785312 | 0.230383  | 0         | 0         | 0           | 0.094096844 | 0           | 0           |
| CaWRKY10 | 68.883716      | 75.673234 | 95.464942 | 16.037506 | 50.255536 | 3.069109245 | 5.645810613 | 8.361705137 | 3.760038033 |
| CaWRKY11 | 73.369374      | 42.672947 | 134.40228 | 26.388297 | 102.99274 | 5.387386886 | 24.82659675 | 84.86250309 | 171.6908742 |
| CaWRKY12 | 109.84369      | 144.41754 | 170.80017 | 7.8287353 | 55.235125 | 2.769683953 | 3.599204266 | 3.401371581 | 4.700047542 |
| CaWRKY13 | 17.623745      | 1.1760173 | 8.9720571 | 0.4305498 | 0.2893062 | 0           | 0.266510315 | 0           | 1.092261407 |
| CaWRKY14 | 17.220929      | 151.09067 | 150.72291 | 19.186374 | 81.356074 | 7.263736776 | 5.555074371 | 8.078257506 | 27.133736   |
| CaWRKY15 | 50.147443      | 73.821149 | 133.35536 | 11.521082 | 50.578101 | 0           | 0.237718342 | 0.119346371 | 1.704956517 |
| CaWRKY16 | 22.872551      | 1.4564522 | 3.2324502 | 1.56411   | 5.9476909 | 0           | 0           | 0           | 0.811634245 |
| CaWRKY17 | 0              | 0         | 0         | 0.0881915 | 0         | 0.173712383 | 0           | 0           | 0.419499252 |
| CaWRKY18 | 4.9334228      | 1.0993031 | 8.6110355 | 0.2525265 | 0.8272103 | 0           | 0           | 0           | 0           |
| CaWRKY19 | 0              | 0         | 0         | 0         | 0         | 0.405157072 | 0           | 0           | 0           |
| CaWRKY20 | 33.455013      | 39.130017 | 91.747713 | 4.0050695 | 12.886664 | 0.075854407 | 3.003571246 | 1.866975068 | 30.11501231 |
| CaWRKY21 | 33.407379      | 46.260653 | 49.24968  | 19.77319  | 23.100422 | 33.93163117 | 32.61576556 | 23.53212559 | 16.92274941 |

---

|          |           |           |           |           |           |             |             |             |             |
|----------|-----------|-----------|-----------|-----------|-----------|-------------|-------------|-------------|-------------|
| CaWRKY22 | 41.106078 | 30.280285 | 17.148624 | 2.2426577 | 6.6442578 | 8.500155648 | 9.149534258 | 13.6855186  | 2.909350695 |
| CaWRKY23 | 342.32664 | 278.27678 | 189.7568  | 45.027409 | 135.95291 | 30.60109425 | 25.06032175 | 46.33682368 | 25.23831797 |
| CaWRKY24 | 23.545881 | 37.586466 | 43.593367 | 8.9962548 | 21.046139 | 18.69935493 | 24.31169349 | 58.44597234 | 34.95460325 |
| CaWRKY25 | 0         | 0.0931785 | 0         | 426.05413 | 54.096847 | 0           | 0           | 0           | 0           |
| CaWRKY26 | 20.258825 | 0.0748967 | 0.3740078 | 0.0731208 | 0.2210995 | 0           | 0           | 0           | 0           |
| CaWRKY27 | 58.753996 | 263.02139 | 228.53736 | 28.276336 | 34.033041 | 9.680866353 | 29.21784973 | 52.84340821 | 5.890140327 |
| CaWRKY28 | 214.72135 | 270.98899 | 487.76732 | 78.156937 | 262.41655 | 11.06728238 | 39.97727537 | 108.3771572 | 200.2782652 |
| CaWRKY29 | 0.2056998 | 0.7266291 | 1.7278722 | 0         | 0         | 0           | 0           | 0           | 0           |
| CaWRKY30 | 37.589903 | 22.69229  | 16.918911 | 10.730956 | 16.136678 | 24.80183432 | 18.80245242 | 26.786332   | 9.797114368 |
| CaWRKY31 | 9.4621902 | 7.4219976 | 5.8171699 | 3.0402856 | 4.1879614 | 5.040325752 | 6.35153694  | 5.763435179 | 2.98874818  |
| CaWRKY32 | 4.500462  | 3.1078337 | 4.9078553 | 0         | 0.9409758 | 0.459723681 | 0.541769705 | 0.217596162 | 0.55509497  |
| CaWRKY33 | 17.061733 | 14.445244 | 13.584651 | 6.9052923 | 7.7362812 | 7.166933661 | 7.373298872 | 12.2814275  | 12.25419999 |
| CaWRKY34 | 29.870548 | 64.320448 | 104.8313  | 47.469819 | 19.328411 | 9.094788637 | 23.82570486 | 21.79847263 | 31.70158702 |
| CaWRKY35 | 24.412267 | 15.277804 | 17.247776 | 2.1554263 | 10.254178 | 3.141731051 | 2.001313464 | 0.160761343 | 0.328085982 |
| CaWRKY36 | 27.933902 | 39.544505 | 23.546728 | 5.6497846 | 16.061483 | 10.77180142 | 13.18181738 | 4.929678561 | 17.50271864 |
| CaWRKY37 | 15.673064 | 10.666407 | 14.82914  | 13.085637 | 16.159819 | 7.508038279 | 5.363520083 | 5.568685446 | 7.36463755  |
| CaWRKY38 | 64.266254 | 69.316066 | 65.517943 | 63.262458 | 69.930058 | 23.09277321 | 22.6940339  | 33.5291118  | 30.78628328 |
| CaWRKY39 | 3.9316989 | 17.006478 | 49.85377  | 0.8301618 | 4.3231358 | 0           | 0.256935094 | 0.257988264 | 0           |
| CaWRKY40 | 0.2654692 | 0         | 8.8206248 | 0.3487724 | 1.933439  | 0           | 0           | 0           | 0           |
| CaWRKY41 | 112.29558 | 161.62142 | 26.965895 | 8.2786813 | 21.483308 | 9.370250321 | 7.97357531  | 4.435121768 | 16.0455099  |
| CaWRKY42 | 25.652633 | 308.24929 | 355.75319 | 20.44546  | 74.595856 | 0.482709865 | 1.300247293 | 0.261115394 | 0.532891171 |
| CaWRKY43 | 0.5169289 | 0         | 0.0526326 | 0.0926099 | 0.0466716 | 0           | 1.160842022 | 0.690726093 | 0           |
| CaWRKY44 | 21.752054 | 6.5326167 | 4.0405628 | 1.2546337 | 8.5358427 | 0.411879135 | 1.262004725 | 11.01469802 | 3.182879393 |
| CaWRKY45 | 22.806729 | 9.9082686 | 109.66398 | 1.6474235 | 7.2805207 | 0.249612309 | 0.392213534 | 0.236292724 | 0.843906722 |
| CaWRKY46 | 1.062185  | 0.1649293 | 0.183022  | 1.046621  | 4.2196371 | 0.079290321 | 0.149505786 | 0.22517791  | 0.153183002 |
| CaWRKY47 | 0         | 0         | 0         | 0         | 0.1323247 | 0.064648643 | 0.060949092 | 0           | 0.249792736 |

---



---

|          |                    |       |       |       |        |       |        |        |
|----------|--------------------|-------|-------|-------|--------|-------|--------|--------|
| SIWRKY09 | solyc04g050210.1.1 | 0.00  | 0.00  | 0.00  | 0.00   | 0.00  | 0.00   | 0.00   |
| SIWRKY10 | solyc01g058540.2.1 | 0.05  | 0.18  | 0.16  | 0.09   | 0.50  | 0.00   | 0.07   |
| SIWRKY11 | solyc07g066220.2.1 | 56.49 | 19.57 | 23.86 | 46.40  | 51.65 | 43.28  | 50.39  |
| SIWRKY12 | solyc06g066370.2.1 | 55.78 | 69.95 | 6.41  | 30.79  | 73.48 | 54.15  | 95.18  |
| SIWRKY13 | solyc03g082750.1.1 | 0.00  | 0.00  | 0.08  | 0.00   | 0.00  | 0.00   | 0.00   |
| SIWRKY14 | solyc05g015850.2.1 | 13.92 | 0.79  | 1.19  | 1.51   | 15.64 | 2.89   | 1.41   |
| SIWRKY15 | solyc09g066010.1.1 | 19.90 | 2.57  | 2.87  | 2.53   | 2.42  | 1.23   | 1.15   |
| SIWRKY16 | solyc01g095630.2.1 | 17.32 | 43.41 | 9.53  | 9.63   | 50.43 | 19.40  | 44.89  |
| SIWRKY17 | solyc08g081610.2.1 | 3.55  | 0.76  | 0.63  | 0.58   | 0.16  | 0.00   | 0.00   |
| SIWRKY18 | solyc09g010960.2.1 | 1.00  | 0.33  | 0.26  | 0.00   | 0.00  | 0.00   | 0.00   |
| SIWRKY19 | solyc12g056750.1.1 | 2.89  | 0.00  | 0.00  | 0.00   | 0.00  | 0.00   | 0.00   |
| SIWRKY20 | solyc02g088340.2.1 | 17.77 | 83.52 | 10.34 | 21.24  | 45.44 | 228.13 | 34.35  |
| SIWRKY21 | solyc02g071130.2.1 | 4.92  | 0.32  | 0.04  | 0.68   | 1.00  | 0.22   | 0.32   |
| SIWRKY22 | solyc08g082110.2.1 | 9.35  | 9.40  | 0.49  | 1.14   | 9.02  | 2.71   | 1.14   |
| SIWRKY23 | solyc09g015770.2.1 | 9.84  | 23.99 | 12.95 | 11.71  | 73.82 | 39.28  | 124.04 |
| SIWRKY24 | solyc05g050040.1.1 | 0.00  | 0.00  | 0.00  | 0.00   | 0.00  | 0.00   | 0.00   |
| SIWRKY25 | solyc07g051840.2.1 | 13.85 | 6.46  | 8.93  | 13.57  | 5.71  | 12.48  | 27.19  |
| SIWRKY26 | solyc05g050340.2.1 | 3.01  | 2.76  | 1.42  | 2.17   | 5.54  | 5.36   | 2.00   |
| SIWRKY27 | solyc03g104810.2.1 | 36.91 | 30.27 | 63.43 | 117.49 | 32.62 | 36.00  | 40.13  |
| SIWRKY28 | solyc03g007380.1.1 | 3.62  | 0.51  | 0.04  | 0.43   | 0.88  | 0.31   | 0.11   |
| SIWRKY29 | solyc05g045800.1.1 | 0.00  | 0.00  | 0.00  | 0.00   | 0.00  | 0.00   | 0.00   |
| SIWRKY30 | solyc04g051690.2.1 | 3.35  | 1.40  | 0.24  | 1.58   | 2.07  | 1.10   | 0.32   |
| SIWRKY31 | solyc05g050050.1.1 | 0.00  | 0.00  | 0.00  | 0.00   | 0.00  | 0.00   | 0.00   |
| SIWRKY32 | solyc05g050300.1.1 | 0.00  | 0.00  | 0.00  | 0.00   | 0.00  | 0.00   | 0.00   |
| SIWRKY33 | solyc02g093050.2.1 | 23.15 | 11.22 | 11.68 | 6.40   | 8.31  | 2.78   | 4.61   |
| SIWRKY34 | solyc08g008280.2.1 | 7.55  | 6.53  | 0.62  | 1.85   | 40.29 | 15.96  | 11.23  |

---

---

|          |                    |        |       |       |       |       |       |       |
|----------|--------------------|--------|-------|-------|-------|-------|-------|-------|
| SIWRKY35 | solyc12g011200.1.1 | 4.12   | 1.55  | 2.32  | 1.10  | 0.00  | 0.00  | 0.00  |
| SIWRKY35 | solyc03g082810.1.1 | 0.00   | 0.00  | 2.42  | 0.00  | 0.00  | 0.00  | 0.00  |
| SIWRKY37 | solyc09g014990.2.1 | 12.62  | 9.57  | 0.17  | 1.23  | 17.51 | 2.41  | 1.30  |
| SIWRKY38 | solyc10g009550.2.1 | 1.21   | 3.55  | 1.23  | 0.67  | 11.30 | 3.99  | 4.37  |
| SIWRKY38 | solyc10g011910.2.1 | 9.84   | 2.66  | 0.48  | 0.42  | 3.59  | 0.83  | 0.54  |
| SIWRKY39 | solyc05g045710.1.1 | 0.00   | 0.00  | 0.00  | 0.00  | 0.00  | 0.00  | 0.00  |
| SIWRKY40 | solyc12g042590.1.1 | 0.00   | 0.23  | 0.00  | 0.31  | 0.17  | 0.00  | 0.00  |
| SIWRKY41 | solyc08g006320.2.1 | 100.24 | 90.02 | 18.55 | 31.37 | 79.44 | 43.06 | 52.97 |
| SIWRKY42 | solyc04g056360.2.1 | 0.07   | 0.04  | 25.48 | 13.29 | 0.00  | 0.00  | 0.00  |
| SIWRKY43 | solyc05g050060.1.1 | 0.00   | 0.00  | 0.00  | 0.00  | 0.00  | 0.00  | 0.00  |
| SIWRKY44 | solyc04g051540.2.1 | 2.23   | 1.32  | 0.31  | 0.24  | 0.00  | 0.00  | 0.00  |
| SIWRKY45 | solyc02g032950.2.1 | 2.65   | 2.08  | 1.82  | 2.73  | 0.75  | 0.06  | 0.05  |
| SIWRKY46 | solyc05g012770.2.1 | 21.33  | 3.27  | 9.38  | 6.26  | 2.80  | 7.17  | 12.09 |
| SIWRKY48 | solyc10g005680.1.1 | 0.00   | 0.00  | 0.04  | 0.00  | 0.00  | 0.00  | 0.00  |
| SIWRKY49 | solyc03g116890.2.1 | 6.14   | 2.62  | 2.20  | 1.13  | 21.83 | 10.66 | 23.27 |
| SIWRKY50 | solyc03g113120.2.1 | 3.63   | 0.09  | 0.00  | 0.00  | 0.00  | 0.00  | 0.00  |
| SIWRKY51 | solyc07g005650.2.1 | 6.27   | 3.01  | 4.49  | 9.17  | 7.36  | 9.28  | 8.80  |
| SIWRKY52 | solyc02g094270.1.1 | 1.42   | 0.00  | 0.00  | 0.00  | 0.61  | 0.00  | 0.10  |
| SIWRKY53 | solyc05g012500.2.1 | 9.33   | 4.18  | 5.95  | 7.66  | 28.41 | 37.28 | 40.56 |
| SIWRKY54 | solyc05g050330.2.1 | 6.12   | 4.84  | 4.09  | 5.42  | 2.78  | 3.88  | 3.39  |
| SIWRKY55 | solyc02g072190.2.1 | 29.27  | 2.04  | 0.42  | 0.24  | 0.51  | 0.46  | 0.72  |
| SIWRKY56 | solyc10g084380.1.1 | 0.24   | 8.16  | 10.91 | 5.67  | 0.18  | 0.00  | 0.00  |
| SIWRKY57 | solyc06g008610.2.1 | 26.77  | 6.14  | 8.99  | 17.02 | 22.12 | 7.57  | 19.36 |
| SIWRKY58 | solyc04g078550.2.1 | 62.06  | 18.93 | 11.73 | 30.60 | 52.76 | 30.65 | 53.14 |
| SIWRKY59 | solyc06g070990.2.1 | 10.56  | 0.17  | 0.00  | 0.08  | 0.63  | 0.03  | 0.00  |
| SIWRKY60 | solyc04g072070.2.1 | 2.00   | 0.32  | 0.19  | 0.49  | 1.50  | 0.00  | 0.13  |

---

|          |                    |       |       |        |       |       |       |       |
|----------|--------------------|-------|-------|--------|-------|-------|-------|-------|
| SIWRKY61 | solyc07g065260.2.1 | 40.78 | 14.72 | 15.39  | 12.43 | 24.02 | 22.06 | 12.38 |
| SIWRKY62 | solyc06g048870.1.1 | 0.42  | 0.07  | 0.00   | 0.00  | 0.00  | 0.00  | 0.00  |
| SIWRKY63 | solyc01g079260.2.1 | 15.86 | 3.45  | 5.34   | 3.83  | 13.08 | 12.32 | 75.66 |
| SIWRKY64 | solyc08g062490.2.1 | 6.30  | 4.62  | 1.63   | 1.31  | 1.84  | 0.31  | 0.45  |
| SIWRKY65 | solyc05g053380.2.1 | 0.67  | 0.23  | 0.28   | 0.10  | 0.20  | 0.13  | 0.26  |
| SIWRKY66 | solyc01g095100.2.1 | 12.40 | 1.87  | 1.76   | 2.92  | 1.26  | 0.88  | 0.24  |
| SIWRKY67 | solyc05g014040.1.1 | 0.00  | 0.00  | 0.00   | 0.00  | 0.00  | 0.00  | 0.00  |
| SIWRKY68 | solyc08g067360.2.1 | 1.36  | 0.16  | 0.00   | 0.06  | 0.41  | 0.00  | 0.26  |
| SIWRKY69 | solyc05g045880.1.1 | 0.00  | 0.00  | 0.00   | 0.00  | 0.00  | 0.00  | 0.00  |
| SIWRKY70 | solyc05g055750.2.1 | 0.11  | 0.03  | 100.91 | 3.92  | 0.00  | 0.05  | 0.00  |
| SIWRKY71 | solyc01g089960.2.1 | 0.22  | 0.76  | 2.05   | 1.56  | 0.00  | 0.09  | 0.00  |
| SIWRKY72 | solyc10g007970.1.1 | 1.80  | 0.00  | 0.06   | 0.00  | 0.40  | 0.12  | 0.00  |
| SIWRKY73 | solyc06g068460.2.1 | 12.75 | 68.70 | 8.66   | 10.31 | 86.79 | 82.67 | 49.98 |
| SIWRKY74 | solyc02g080890.2.1 | 6.92  | 1.84  | 1.44   | 3.67  | 4.33  | 0.61  | 5.62  |
| SIWRKY75 | solyc12g006170.1.1 | 21.25 | 8.65  | 14.18  | 24.68 | 14.45 | 18.31 | 18.26 |
| SIWRKY76 | solyc03g095770.2.1 | 15.44 | 22.14 | 10.52  | 2.75  | 74.87 | 14.89 | 24.66 |
| SIWRKY77 | solyc08g081630.1.1 | 0.30  | 0.21  | 0.00   | 0.00  | 0.00  | 0.00  | 0.00  |
| SIWRKY78 | solyc07g055280.2.1 | 38.11 | 4.22  | 4.05   | 7.95  | 1.57  | 2.30  | 0.79  |
| SIWRKY79 | solyc08g067340.2.1 | 8.15  | 0.65  | 0.29   | 1.17  | 14.67 | 4.05  | 22.47 |
| SIWRKY80 | solyc01g104550.2.1 | 2.35  | 1.07  | 0.99   | 1.10  | 0.00  | 0.00  | 0.00  |
| SIWRKY81 | solyc02g067430.2.1 | 7.98  | 0.00  | 0.00   | 0.00  | 0.00  | 0.00  | 0.00  |

Note. Fruit-Dev5, Mature green; Fruit-Dev6, Breaker (fruit turning red); Fruit-Dev7, Breaker plus 10 days

Supplemental Table S5. Average expression level of different groups of fruit-expressed CaWRKYs during fruit maturation.

| <b>Group Type</b> | <b>Fruit-Dev5</b> | <b>Fruit-Dev6</b> | <b>Fruit-Dev7</b> | <b>Fruit-Dev8</b> |
|-------------------|-------------------|-------------------|-------------------|-------------------|
| I                 | 14.14             | 18.45             | 28.80             | 37.94             |
| IIa               | 9.68              | 29.22             | 52.84             | 5.89              |
| IIb               | 7.24              | 24.33             | 53.33             | 101.70            |
| IIc               | 3.92              | 5.66              | 11.75             | 16.95             |
| IId               | 14.19             | 11.74             | 20.63             | 9.58              |
| IIe               | 4.42              | 5.19              | 4.92              | 8.63              |
| III               | 0.08              | 1.88              | 1.65              | 17.65             |
| NG                | 2.52              | 2.78              | 0.83              | 15.81             |
| All CaWRKYs       | 8.66              | 11.85             | 20.12             | 26.13             |



Supplemental Table S6. Number of stress-regulated CaWRKYs in pepper during fruit maturation.

|             | High Salinity |   | Drought |    | Heat |   |
|-------------|---------------|---|---------|----|------|---|
|             | +             | - | +       | -  | +    | - |
| Fruit-Dev5  | 15            | 2 | 1       | 6  | 11   | 3 |
| Fruit-Dev6  | 17            | 2 | 2       | 6  | 13   | 4 |
| Fruit-Dev7  | 16            | 0 | 1       | 5  | 11   | 4 |
| Fruit-Dev8  | 20            | 2 | 2       | 9  | 17   | 3 |
| All CaWRKYs | 23            | 3 | 3       | 11 | 19   | 6 |

Supplemental Table S7. The responses of CaWRKYs to plant hormones and abiotic stresses

|          |     | CK          | SA        | JA        | ABA       | BR        | Salt      | Drought     | Heat      |
|----------|-----|-------------|-----------|-----------|-----------|-----------|-----------|-------------|-----------|
| CaWRKY01 | Ave | 1.000002163 | 0.0004272 | 0.0082695 | 0.0014499 | 0.1646833 | 0.0101448 | 0.004862833 | 0.0349321 |
|          | Std | 0.112346456 | 0.0001321 | 0.0021345 | 0.0003245 | 0.052163  | 0.0015499 | 0.001608086 | 0.0230706 |
| CaWRKY3  | Ave | 1.007201836 | 4.6375739 | 1.5977337 | 2.874034  | 4.6803781 | 4.5464655 | 0.965270777 | 6.9359173 |
|          | Std | 0.144409877 | 4.1628885 | 0.1038787 | 0.2512212 | 0.2856751 | 0.2203404 | 0.091287701 | 1.2530069 |
| CaWRKY6  | Ave | 1.010677973 | 8.4400879 | 0.9343689 | 1.9214835 | 7.7307793 | 3.8798271 | 0.318902215 | 14.638979 |
|          | Std | 0.175976592 | 0.4878001 | 0.1040917 | 0.0170606 | 0.182163  | 0.3251896 | 0.10154988  | 0.8809928 |
| CaWRKY8  | Ave | 1.009649294 | 5.7092762 | 0.3192433 | 0.4686057 | 1.9677172 | 3.2712521 | 0.25265012  | 0.5647711 |
|          | Std | 0.175667531 | 0.2017363 | 0.0194499 | 0.0159017 | 0.1584799 | 0.2542858 | 0.072185066 | 0.0730706 |
| CaWRKY10 | Ave | 1.16147884  | 17.650867 | 2.8429505 | 7.2735604 | 12.763186 | 42.088937 | 22.61953855 | 5.6023432 |
|          | Std | 0.641608086 | 0.8714628 | 1.2526694 | 4.2195773 | 1.0793397 | 7.0008427 | 3.875232986 | 1.8972487 |
| CaWRKY11 | Ave | 1.002873078 | 3.9054422 | 0.9645419 | 1.8398036 | 5.7437775 | 8.7784394 | 1.134970615 | 5.6150323 |
|          | Std | 0.091489389 | 0.3125412 | 0.2591686 | 0.08366   | 0.7144468 | 1.1181348 | 0.557095826 | 1.2144499 |
| CaWRKY12 | Ave | 1.004816613 | 0.3547992 | 0.0939694 | 0.1671429 | 0.3133667 | 0.9962894 | 0.042082052 | 3.1931725 |
|          | Std | 0.121893593 | 0.0183834 | 0.0037585 | 0.0244385 | 0.0062908 | 0.1226654 | 0.010243133 | 0.2612925 |
| CaWRKY14 | Ave | 1.021475614 | 13.266748 | 0.1766798 | 0.5434357 | 67.678526 | 18.276431 | 0.531535134 | 2.1622629 |
|          | Std | 0.24548359  | 1.2848633 | 0.1353409 | 0.5893501 | 3.545675  | 0.9936148 | 0.206237071 | 0.6469807 |
| CaWRKY20 | Ave | 1.807274719 | 17.61032  | 0         | 3.7567893 | 0.6870974 | 22.187488 | 9.108361518 | 53.224926 |
|          | Std | 2.230157167 | 1.4120822 | 0         | 2.123442  | 0.165681  | 4.6648647 | 3.981347258 | 15.158353 |
| CaWRKY21 | Ave | 1.00466105  | 1.0357431 | 1.6884771 | 1.1411684 | 1.3313411 | 1.8305407 | 0.387828555 | 1.0498021 |
|          | Std | 0.118105188 | 0.0799693 | 0.0872731 | 0.1121974 | 0.1219446 | 0.2253671 | 0.12656385  | 0.1132647 |
| CaWRKY22 | Ave | 1.016555713 | 2.8690227 | 1.4460656 | 1.1843925 | 2.3646752 | 4.6997355 | 0.840487161 | 0.2035604 |
|          | Std | 0.214398688 | 0.1697935 | 0.1047777 | 0.1264647 | 0.1730422 | 0.241597  | 0.296865517 | 0.0607279 |
| CaWRKY23 | Ave | 1.144724945 | 13.583813 | 7.6970842 | 3.0687397 | 5.685456  | 9.1936257 | 1.244721181 | 20.378946 |
|          | Std | 0.605858591 | 0.4893473 | 1.9811931 | 1.0191985 | 0.8151275 | 3.2840979 | 0.31965637  | 4.7044807 |

|          |     |             |           |           |           |           |           |             |           |
|----------|-----|-------------|-----------|-----------|-----------|-----------|-----------|-------------|-----------|
| CaWRKY24 | Ave | 1.008625556 | 0.6299722 | 1.1518029 | 0.8823696 | 0.9353522 | 1.0286166 | 0.272132703 | 0.7746531 |
|          | Std | 0.160292448 | 0.0264335 | 0.0844304 | 0.0563444 | 0.0513152 | 0.1113181 | 0.080045444 | 0.1310406 |
| CaWRKY27 | Ave | 1.012460496 | 1.1480897 | 2.7831596 | 1.6926889 | 1.5792536 | 1.9767796 | 0.147188531 | 2.0929202 |
|          | Std | 0.200712426 | 0.0539634 | 0.3231346 | 0.1313841 | 0.1366592 | 0.0380019 | 0.050835067 | 0.0600027 |
| CaWRKY28 | Ave | 1.005665726 | 2.237654  | 0.8126021 | 0.8150683 | 1.4935005 | 3.4901656 | 0.667657819 | 20.688429 |
|          | Std | 0.12873275  | 0.0824345 | 0.03013   | 0.0384446 | 0.059461  | 0.2394018 | 0.213827528 | 1.8105664 |
| CaWRKY30 | Ave | 1.01864804  | 2.0974413 | 3.1549716 | 3.6565171 | 1.589065  | 3.6527199 | 1.177173777 | 1.9282291 |
|          | Std | 0.248469785 | 0.1673693 | 0.3362219 | 0.1123348 | 0.171946  | 0.4309715 | 0.405492144 | 0.4283116 |
| CaWRKY31 | Ave | 1.10547778  | 2.9507315 | 1.3486098 | 1.2114224 | 2.4491254 | 1.4415459 | 0.375533882 | 0.5803925 |
|          | Std | 0.591483041 | 0.1492595 | 0.1605235 | 0.1601744 | 0.2237192 | 0.1815454 | 0.141514321 | 0.0372929 |
| CaWRKY33 | Ave | 1.020273769 | 1.4451136 | 2.8711204 | 1.984679  | 1.8973567 | 4.318741  | 0.758664742 | 1.7707125 |
|          | Std | 0.236333809 | 0.0195077 | 0.2479759 | 0.1920511 | 0.1924784 | 0.3356441 | 0.232069751 | 0.1889597 |
| CaWRKY34 | Ave | 1.033635203 | 2.1358143 | 1.5570387 | 1.3770478 | 4.5263045 | 3.0957396 | 0.405153764 | 4.8666209 |
|          | Std | 0.326563896 | 0.0285005 | 0.1608609 | 0.051231  | 0.4505064 | 0.3462879 | 0.153327734 | 0.7604319 |
| CaWRKY35 | Ave | 1.000000189 | 28.140877 | 0.0722466 | 0.0408772 | 78.505134 | 5.8154446 | 0.016141636 | 0.0097947 |
|          | Std | 0.221752295 | 5.3776685 | 0.0266713 | 0.0185384 | 12.443125 | 1.337683  | 0.08760376  | 0.007862  |
| CaWRKY36 | Ave | 1.006676503 | 1.8566108 | 1.1019527 | 3.5349264 | 1.3043095 | 14.838544 | 0.239487414 | 1.167124  |
|          | Std | 0.139068431 | 0.3376824 | 0.0898959 | 0.9404318 | 0.3169967 | 1.4935798 | 0.127601671 | 0.1769144 |
| CaWRKY37 | Ave | 1.013336131 | 0.9408327 | 6.8469759 | 4.0769668 | 0.5622729 | 5.1146812 | 0.802751551 | 0.2296615 |
|          | Std | 0.194442295 | 0.0420685 | 0.5586713 | 0.8126384 | 0.0095246 | 0.7136407 | 0.292831581 | 0.1076038 |
| CaWRKY38 | Ave | 1.008320727 | 0.8781589 | 4.845222  | 4.0772165 | 1.0791144 | 7.7018535 | 1.387228584 | 4.9845674 |
|          | Std | 0.163157807 | 0.0335127 | 0.1161155 | 0.4422484 | 0.0402829 | 0.5362875 | 0.420770703 | 0.777862  |
| CaWRKY41 | Ave | 1.002945149 | 0.1851042 | 0.4065329 | 0.2906576 | 0.1458645 | 0.3624985 | 0.063869722 | 3.2941168 |
|          | Std | 0.09513602  | 0.0185489 | 0.0355514 | 0.0272589 | 0.0049255 | 0.0568202 | 0.036952872 | 0.4216427 |
| CaWRKY44 | Ave | 1.045832858 | 3.5694737 | 0.4045236 | 0.6294742 | 0.597579  | 1.1358398 | 0.206027286 | 0.065728  |
|          | Std | 0.400518584 | 0.5159653 | 0.0895193 | 0.2015095 | 0.2103341 | 0.2268544 | 0.03872342  | 0.0247197 |

|          |     |             |           |           |           |           |           |             |           |
|----------|-----|-------------|-----------|-----------|-----------|-----------|-----------|-------------|-----------|
| CaWRKY48 | Ave | 1.004099641 | 0.78435   | 4.9252407 | 3.8545205 | 1.1871047 | 2.8993368 | 1.84123213  | 12.426523 |
|          | Std | 0.110626742 | 0.0535732 | 0.4125952 | 0.2929023 | 0.2245636 | 0.3505157 | 0.746411739 | 1.3834557 |
| CaWRKY51 | Ave | 1.325295921 | 1.2021673 | 24.0471   | 11.32895  | 0.0648392 | 14.029733 | 0.487919547 | 7.1612131 |
|          | Std | 1.191760226 | 0.1021138 | 2.9282207 | 3.0746711 | 0.019518  | 5.6952499 | 0.162340595 | 6.5581791 |
| CaWRKY52 | Ave | 0.999999912 | 0.1011448 | 0.0449383 | 0.041783  | 1.9887092 | 0.0323878 | 0.056785994 | 0.2273399 |
|          | Std | 0.266500721 | 0.0364778 | 0.0111298 | 0.0154888 | 0.446195  | 0.0202797 | 0.027053331 | 0.0843395 |
| CaWRKY53 | Ave | 1.731575343 | 3.1478597 | 291.46907 | 190.77484 | 3.7292766 | 595.09345 | 37.84736916 | 192.24884 |
|          | Std | 1.923700721 | 0.1527778 | 10.23433  | 12.078149 | 0.557195  | 12.552671 | 14.27893908 | 35.366769 |
| CaWRKY54 | Ave | 1.0005833   | 0.3736952 | 0.3394166 | 0.4084207 | 0.1713456 | 0.8302797 | 0.148975012 | 0.2705346 |
|          | Std | 0.041917183 | 0.0402157 | 0.0206604 | 0.1051079 | 0.0328816 | 0.123862  | 0.083965606 | 0.0616695 |
| CaWRKY57 | Ave | 1.276815387 | 1.4160823 | 5.173194  | 7.4126386 | 0.1486124 | 1.6744436 | 1.351139367 | 0.881399  |
|          | Std | 0.867221263 | 0.1721788 | 4.0279858 | 1.2251828 | 0.0861721 | 1.043175  | 0.333962652 | 0.3880703 |
| CaWRKY59 | Ave | 1.059390607 | 2.1090945 | 3.7050435 | 2.5721294 | 0.7662121 | 38.016948 | 1.777504773 | 6.2061238 |
|          | Std | 0.423921545 | 0.1744235 | 0.6024794 | 0.1549152 | 0.1679743 | 1.9588988 | 0.746653922 | 0.3066114 |
| CaWRKY60 | Ave | 1.018312937 | 0.7861316 | 0.309941  | 0.2105835 | 10.194487 | 0.3748784 | 0.456124206 | 0.3378427 |
|          | Std | 0.245298437 | 0.0952438 | 0.0544031 | 0.1680706 | 0.8080042 | 0.1433448 | 0.267780321 | 0.2030848 |
| CaWRKY61 | Ave | 1.069357728 | 1.9854401 | 3.7737648 | 71.922503 | 1.8891433 | 22.087198 | 1.810932487 | 24.185779 |
|          | Std | 0.435716353 | 0.1476707 | 1.9903373 | 0.8944792 | 0.1885376 | 4.2368118 | 2.008429967 | 10.346528 |

Red:Up regulated; Green:Down regulated

Supplemental Table S8. Number of hormone-regulated CaWRKYs in pepper during fruit maturation

|             | SA |   | JA |    | ABA |   | BR |    |
|-------------|----|---|----|----|-----|---|----|----|
|             | +  | - | +  | -  | +   | - | +  | -  |
| Fruit-Dev5  | 11 | 2 | 8  | 4  | 10  | 3 | 8  | 2  |
| Fruit-Dev6  | 13 | 2 | 9  | 5  | 12  | 2 | 10 | 3  |
| Fruit-Dev7  | 14 | 1 | 8  | 5  | 10  | 2 | 11 | 10 |
| Fruit-Dev8  | 15 | 4 | 10 | 7  | 15  | 4 | 9  | 4  |
| All CaWRKYs | 19 | 5 | 13 | 12 | 17  | 6 | 13 | 5  |

Supplemental Table S9 Fruit-expressing CaWRKYS are regulated by ABA and other abiotic stresses

| Name     | Group | ABA regulation | Early mature | Late mature | Salt       | Heat        | Drought    |
|----------|-------|----------------|--------------|-------------|------------|-------------|------------|
| CaWRKY01 | NG    | 0.00±0.00      | -            | +           | 0.01±0.0   | 0.03±0.02   | 0.00±0.00  |
| CaWRKY03 | IIc   | 2.87±0.25      | +            | +           | 4.55±0.22  | 6.94±1.25   |            |
| CaWRKY06 | III   | 7.73±0.18      | -            | +           | 3.88±0.33  | 14.64±0.88  | 0.32±0.10  |
| CaWRKY08 | IIId  | 0.47±0.02      | -            | +           | 3.27±0.25  |             | 0.25±0.07  |
| CaWRKY10 | IIe   | 7.27±4.22      | +            | +           | 42.09±7.00 | 5.60±1.90   | 22.62±3.88 |
| CaWRKY11 | IIb   | 1.84±0.08      | +            | +           | 8.78±1.12  | 5.62±1.21   |            |
| CaWRKY12 | NG    | 0.17±0.03      | -            | +           |            | 3.19±0.26   | 0.04±0.01  |
| CaWRKY14 | IIc   |                | +            | +           | 18.28±0.99 |             | 2.16±0.65  |
| CaWRKY20 | III   | 3.76±2.12      | -            | +           | 22.19±4.66 | 53.22±15.16 | 9.10±3.98  |
| CaWRKY21 | I     |                | +            | +           | 1.83±0.23  | 0.39±0.13   | 0.39±0.13  |
| CaWRKY22 | IIId  |                | +            | +           | 4.70±0.24  | 0.20±0.06   |            |
| CaWRKY23 | IIId  | 3.07±1.02      | +            | +           | 9.19±3.28  | 20.38±4.70  |            |
| CaWRKY24 | I     |                | +            | +           |            | 0.27±0.08   | 0.27±0.08  |
| CaWRKY27 | IIa   | 1.69±0.13      | +            | +           | 1.98±0.04  | 2.09±0.06   | 0.15±0.05  |
| CaWRKY28 | I     |                | +            | +           | 3.49±0.24  | 20.69±1.81  |            |
| CaWRKY30 | II d  | 3.66±0.11      | +            | +           | 3.65±0.43  |             |            |
| CaWRKY31 | I     |                | +            | +           |            |             |            |
| CaWRKY33 | I     | 1.98±0.19      | +            | +           | 4.32±0.34  | 1.77±0.19   |            |

|          |      |              |   |   |              |              |             |
|----------|------|--------------|---|---|--------------|--------------|-------------|
| CaWRKY34 | II b |              | + | + | 3.10±0.35    | 4.87±0.76    |             |
| CaWRKY36 | II c | 3.53±0.94    | + | + | 14.84±1.49   |              | 0.24±0.13   |
| CaWRKY37 | I    | 4.08±0.81    | + | + | 5.11±0.71    | 0.23±0.11    |             |
| CaWRKY38 | I    | 4.08±0.44    | + | + | 7.70±0.54    | 4.98±0.78    |             |
| CaWRKY41 | II e | 0.29±0.03    | + | + | 0.36±0.06    | 3.29±0.42    | 0.06±0.04   |
| CaWRKY44 | II c |              | - | + |              | 0.07±0.02    | 0.21±0.04   |
| CaWRKY48 | II e | 3.85±0.29    | - | + | 2.90±0.35    | 12.43±1.38   |             |
| CaWRKY51 | I    | 11.3±3.07    | + | - | 14.03±5.70   | 7.16±6.56    |             |
| CaWRKY52 | NG   | 0.42±0.01    | + | - | 0.03±0.02    | 0.23±0.08    | 0.06±0.03   |
| CaWRKY53 | I    | 190.77±12.08 | + | + | 595.09±12.55 | 192.25±35.37 | 37.85±14.28 |
| CaWRKY54 | II c |              | - | + |              | 0.27±0.06    |             |
| CaWRKY59 | II c | 2.57±0.15    | - | + | 38.02±1.96   | 6.21±0.31    |             |
| CaWRKY60 | II d | 0.21±0.17    | + | + |              |              |             |
| CaWRKY61 | II c | 71.92±0.89   | - | + | 22.09±4.24   | 24.19±10.35  |             |

"+" and "-" represent "expressed" or "not expressed", respectively. Numbers of ABA, Salt, Heat and drought indicate the relative expressions of *CaWRKY* genes under corresponding treatment (The expression genes in control materials are set as 1.0).

Supplemental Table S10 Primers used for qRT-PCR in this study

| Primer     | Sequence (5'→ 3')     | Size (bp) |
|------------|-----------------------|-----------|
| CaWRKY01-F | ATGGAAGGTGGTGAACAA    | 255       |
| CaWRKY01-R | CCCTGCATAGCCTAGTTC    |           |
| CaWRKY04-F | TAGGGTTTAGCCACAATG    | 298       |
| CaWRKY04-R | TAACTCCTGGGATGAAGA    |           |
| CaWRKY13-F | TTGAGAAATCCGTTGATG    | 188       |
| CaWRKY13-R | ATGAGAAGGAGAAGACCC    |           |
| CaWRKY16-F | CAGGGATGAAGAAGATGA    | 282       |
| CaWRKY16-R | GTGGCTGAAAGAGGAAGT    |           |
| CaWRKY24-F | ATGAGTTTAATGGTGGCT    | 151       |
| CaWRKY25-R | AAGACTGGGATAATGCTG    |           |
| CaWRKY26-F | TGCGAGAAGTAATGGAAG    | 191       |
| CaWRKY26-R | TAGGCTAAGGGAAACAAG    |           |
| CaWRKY34-F | CGGAAGCAAGTTCAAAGA    | 264       |
| CaWRKY34-R | TAGGTCCAATGTAACAGTAGG |           |
| CaWRKY38-F | ACTCGCTTCAATCTCACC    | 290       |
| CaWRKY38-R | AACTTGTTTCTGCCCGTA    |           |
| CaWRKY50-F | AAATTTGATCAAGGATGCCA  | 223       |
| CaWRKY50-R | TTCCACCGTCATATCCAAA   |           |



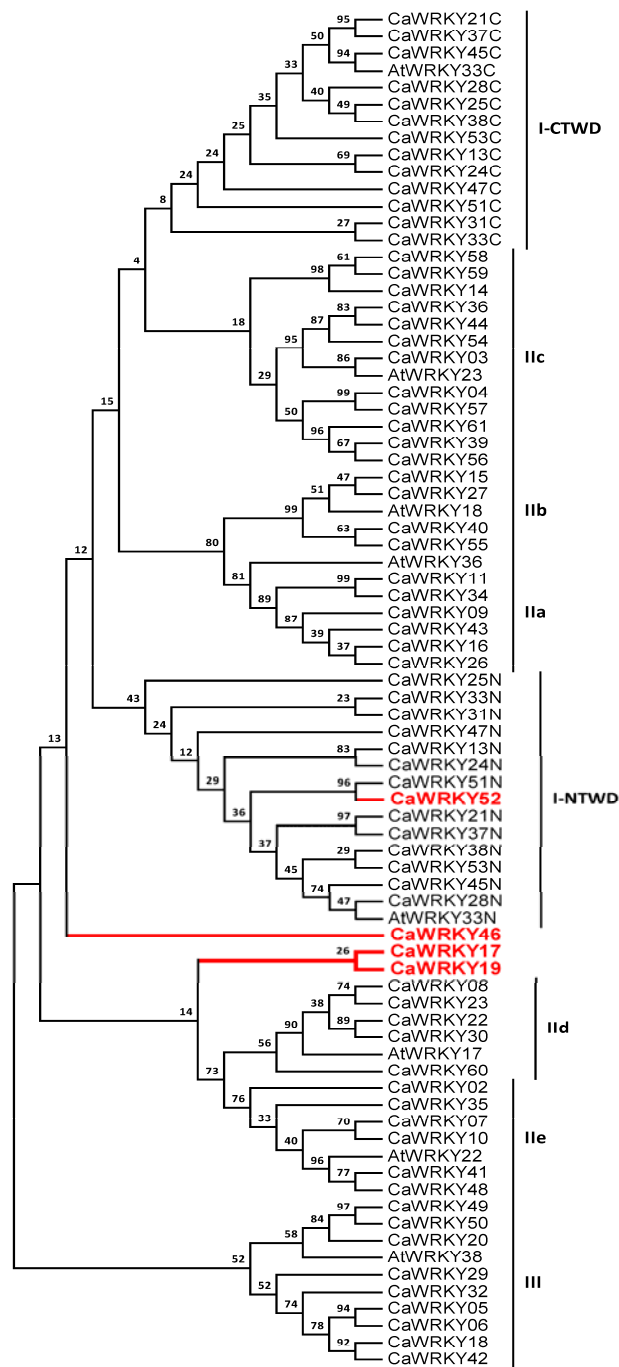

Supplemental Figure S1 Phylogenetic analysis of 61 CaWRKYs. The 74 WRKY domains (C- and N-terminal) derived from the 61 CaWRKY proteins were clustered using Clustal X 2.0, and loaded into MEGA 5.0 for phylogenetic tree construction. The clustered result is strictly consistent with the CaWRKY group classification. Four None-grouped (NG) members were identified according to this tree construction and labeled in red.
